# Supplementary material for: Nanoarchitectonics of the cathode to improve the reversibility of Li–O2 batteries
Source: publisher site journal article supplement (doi:10.3762/bjnano.13.61), 2022-07-21
Supplement: Additional file 1 [file 2190-4286-13-61-S1.pdf]

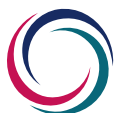

## Supporting Information

for

### **Nanoarchitectonics of the cathode to improve the reversibility of Li–O<sub>2</sub> batteries**

Hien Thi Thu Pham, Jonghyeok Yun, So Yeun Kim, Sang A Han, Jung Ho Kim, Jong-Won Lee and Min-Sik Park

*Beilstein J. Nanotechnol.* **2022**, *13*, 689–698. [doi:10.3762/bjnano.13.61](https://doi.org/10.3762/bjnano.13.61)

### **Additional TEM, EDS, XRD, XPS, BET, SEM, and cathodic overpotential measurements**

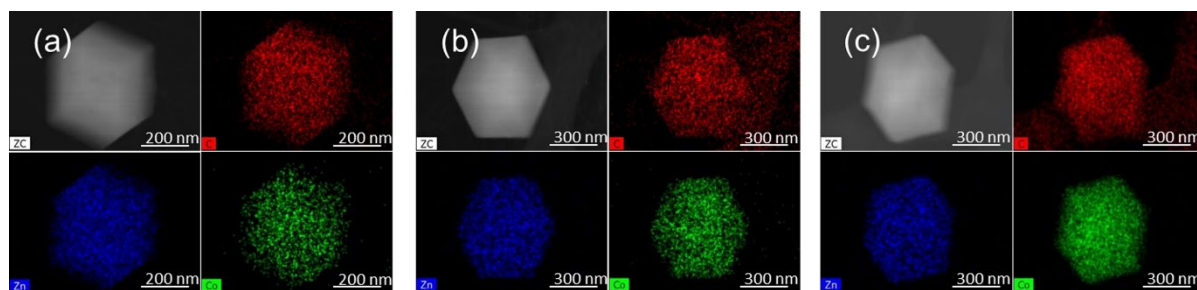

**Figure S1:** EDS elemental mapping results for (a)  $\text{Zn}_4\text{Co}_1/\text{CNT}$ , (b)  $\text{Zn}_1\text{Co}_1/\text{CNT}$ , and (c)  $\text{Zn}_1\text{Co}_4/\text{CNT}$ .

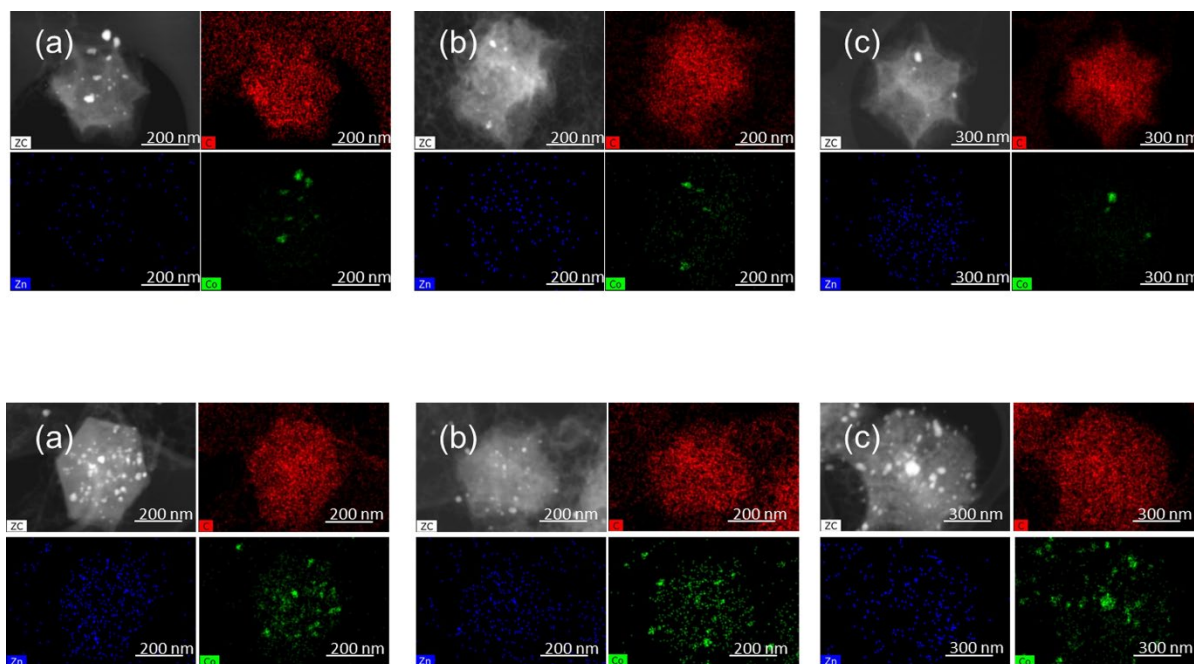

**Figure S2:** EDS elemental mapping results for (a) Zn<sub>4</sub>Co<sub>1</sub>-C/CNT, (b) Zn<sub>1</sub>Co<sub>1</sub>-C/CNT, and (c) Zn<sub>1</sub>Co<sub>4</sub>-C/CNT.

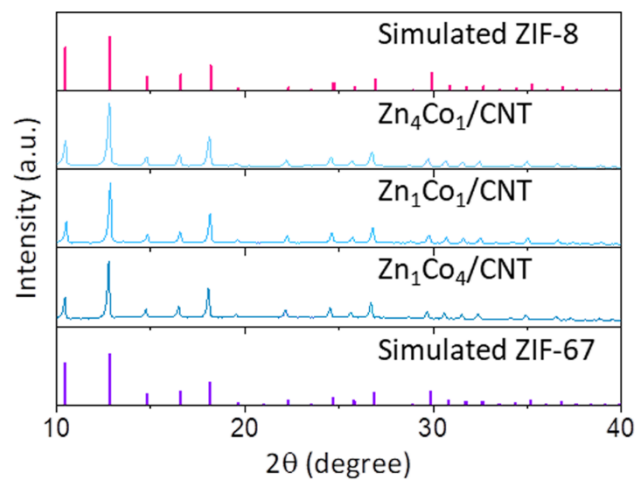

**Figure S3:** XRD patterns of as-synthesized  $Zn_xCo_y/CNT$  composites.

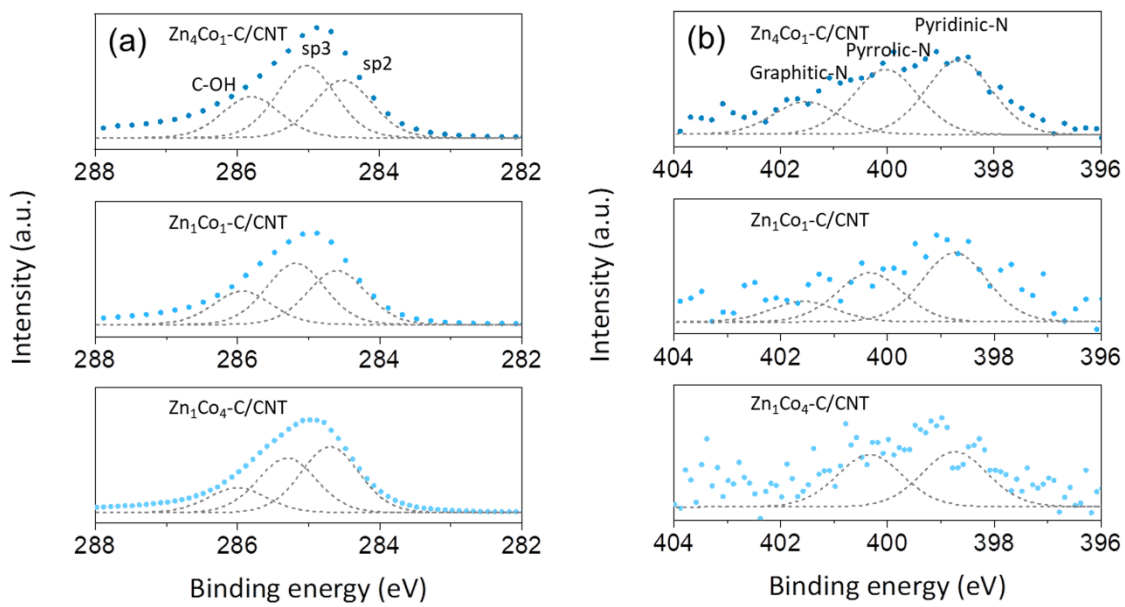

**Figure S4:** XPS spectra of Zn<sub>x</sub>Co<sub>y</sub>-C/CNT: (a) C 1s, and (b) N 1s.

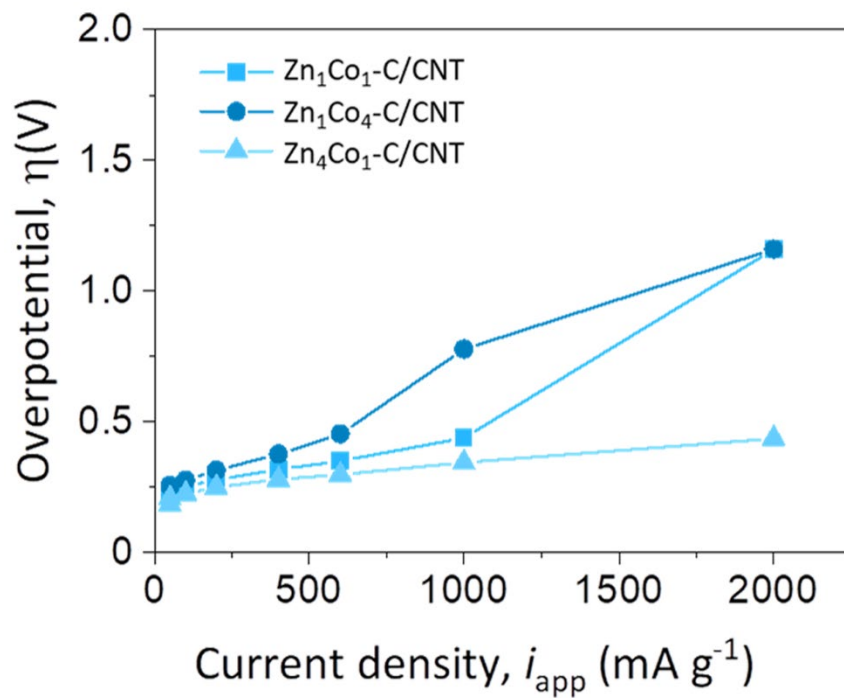

**Figure S5:** Cathodic overpotential ( $\eta$ ) as a function of current density for LOBs with  $\text{Zn}_x\text{Co}_y\text{-C/CNT}$  electrodes. The cells were discharged in pure  $\text{O}_2$  with a limited capacity of  $500 \text{ mAh}\cdot\text{g}^{-1}$  at various current densities in the range of  $50\text{--}2,000 \text{ mA}\cdot\text{g}^{-1}$ .

**Table S1:** Specific surface area and micro/meso/macropore volumes.

| Material                               | BET surface area<br>( $\text{m}^2\cdot\text{g}^{-1}$ ) | Micropore volume<br>( $\text{cm}^3\cdot\text{g}^{-1}$ ) | Mesopore volume<br>( $\text{cm}^3\cdot\text{g}^{-1}$ ) | Mesopore volume<br>( $\text{cm}^3\cdot\text{g}^{-1}$ ) |
|----------------------------------------|--------------------------------------------------------|---------------------------------------------------------|--------------------------------------------------------|--------------------------------------------------------|
| Zn <sub>1</sub> Co <sub>4</sub> -C/CNT | 305                                                    | 0.04                                                    | 1.23                                                   | 0.05                                                   |
| Zn <sub>1</sub> Co <sub>1</sub> -C/CNT | 357                                                    | 0.03                                                    | 0.95                                                   | 0.05                                                   |
| Zn <sub>4</sub> Co <sub>1</sub> -C/CNT | 489                                                    | 0.07                                                    | 0.88                                                   | 0.04                                                   |

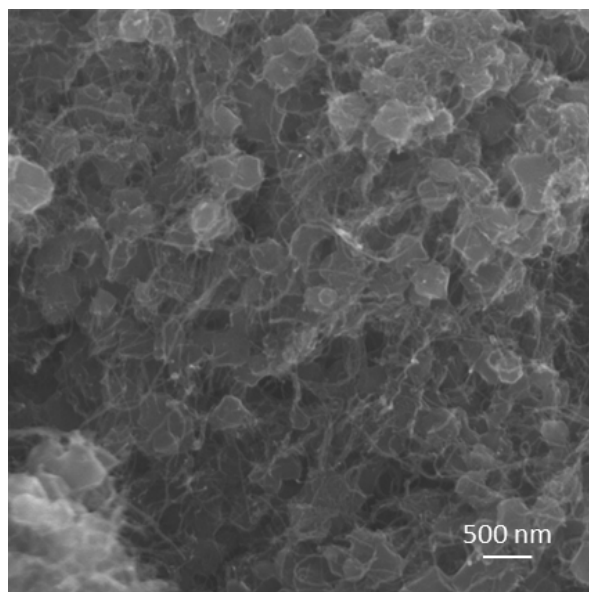

**Figure S6:** SEM image of the Zn<sub>4</sub>Co<sub>1</sub>-C/CNT electrode (charged) after 100 cycles.



**Table S2:** Electrochemical performance of cathodes based on CNTs, MOFs, or mesoporous carbon for Li-O<sub>2</sub> batteries.

| Material                  | Current density          | Depth of discharge       | Number of cycles | Reference |
|---------------------------|--------------------------|--------------------------|------------------|-----------|
| Multiwalled CNT paper     | 250 mA·g <sup>-1</sup>   | 1000 mAh·g <sup>-1</sup> | 50               | S1        |
| Multiwalled CNT foam      | 372 mA·g <sup>-1</sup>   | 510 mAh·g <sup>-1</sup>  | 100              | S2        |
| Ordered mesoporous carbon | 200 mA·g <sup>-1</sup>   | 2000 mAh·g <sup>-1</sup> | 25               | S3        |
| CNT                       | 0.05 mA·cm <sup>-2</sup> | 0.5 mAh·cm <sup>-2</sup> | 73               | S4        |
| Mn-MOF-74                 | 250 mA·g <sup>-1</sup>   | 1000 mAh·g <sup>-1</sup> | 30               | S5        |
| MOF-C/CNT                 | 200 mA·g <sup>-1</sup>   | 500 mAh·g <sup>-1</sup>  | 137              | This work |

S1. Chen, Y.; Li, F.; Tang, D.-M.; Jian, Z.; Liu, C.; Golberg, D.; Yamada, A.; Zou, H. J. *Mater. Chem. A* **2013**, 1, 13076-13081.

S2. Carter, R.; Oakes, L.; Cohn, A. P.; Holzgrafe, J.; Zarick, H. F.; Chatterjee, S.; Bardhan, R.; Pint, C. L. *J. Phys. Chem. C* **2014**, 118, 20137-20151.

S3. Park, J. B.; Lee, J.; Yoon, C. S.; Sun, Y. K. *ACS Appl. Mater. Interfaces* **2013**, 5, 13426-13431.

S4. Nomura, A.; Ito, K.; Kubo, Y. *Sci. Rep.* **2017**, 7, 45596.

S5. Wu, D.; Guo, Z.; Yin, X.; Pang, Q.; Tu, B.; Zhang, L.; Wang, Y. G.; Li, Q. *Adv. Mater.* **2014**, 26, 3258-3262.
